# Supplementary material
Source: PubMed Central journal article supplement (PMC4112462)
Supplement: NIHMS539028-supplement-1.pdf [file NIHMS539028-supplement-1.pdf]

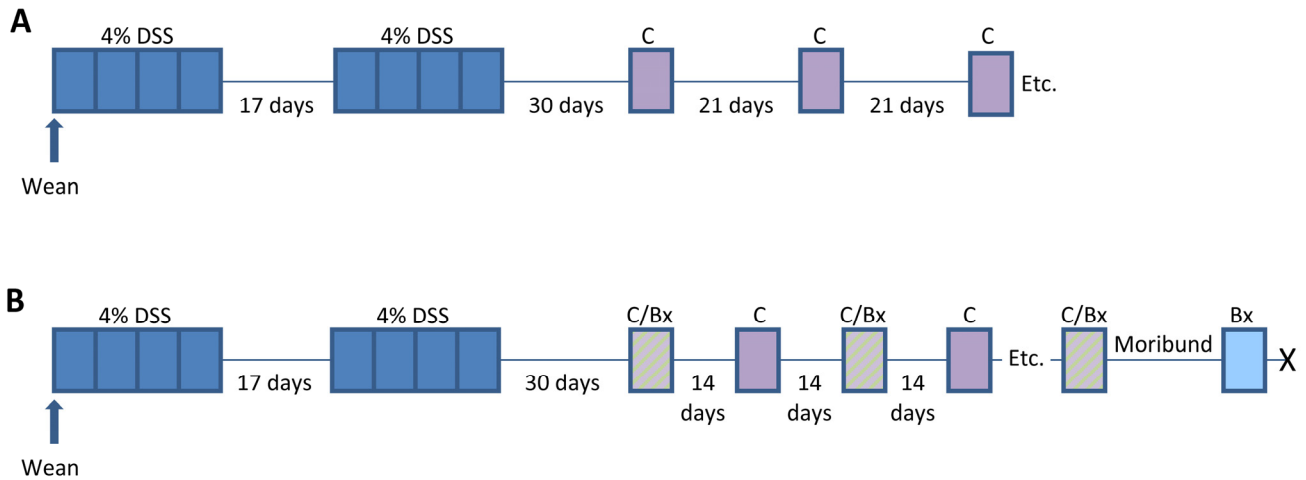

**Supplementary Figure 1.** Panel A illustrates the colonoscopic surveillance protocol. Mice were given 4% dextran sodium sulfate (DSS) in drinking water at weaning for 4 days, followed by 17 days of untreated water, followed by 4 more days of DSS. After 30 days to allow tumor initiation, mice underwent colonoscopy (C) every 21 days until moribund. Panel B shows the serial biopsy protocol. After the same DSS treatment as above, mice with tumors seen on initial colonoscopy underwent colonoscopic biopsy (C/Bx) of colonic tumors. These mice underwent colonoscopy (C) every 14 days. Additionally, every 28 days they underwent additional colonoscopic biopsy of the tumor(s) that were being followed until mice became moribund. A final biopsy (Bx) of tumor tissue was obtained immediately after sacrifice (X).
