# Supplementary material
Source: PubMed Central journal article supplement (PMC4112462)
Supplement: NIHMS539028-supplement-2.pdf [file NIHMS539028-supplement-2.pdf]

**Color Key and Histogram**

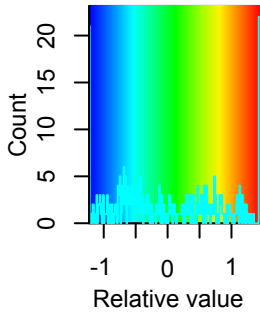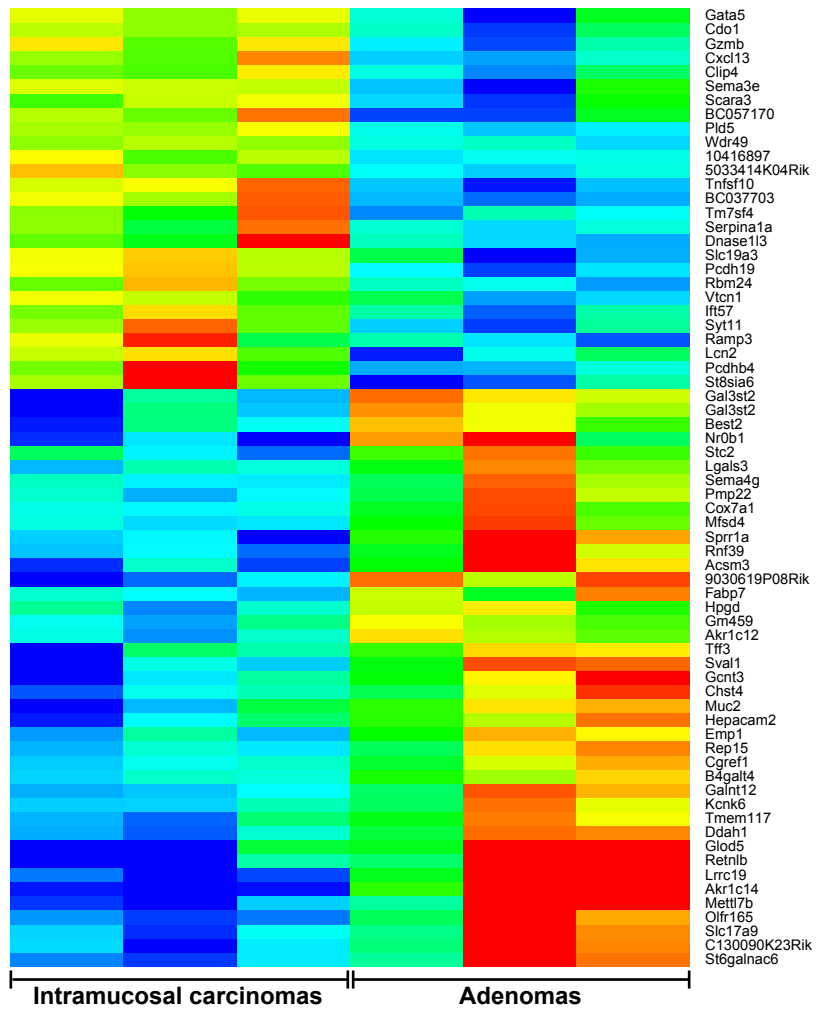

**Supplementary Figure 2.** Relative gene expression is shown for three adenomas and three intramucosal carcinomas taken from the colons of DSS-treated F1 Min mice. Sixty-eight genes were found to be differentially expressed, and gene symbols are listed. Relative expression is represented by the color scheme shown in the upper left corner, with blues representing relative under-expression and reds representing relative over-expression. The value is plotted as log<sub>2</sub> expression level, centered so each gene is the log<sub>2</sub>-fold change compared to average tissue, giving a mean of 0.
