# Supplementary material
Source: PubMed Central journal article supplement (PMC4112462)
Supplement: NIHMS539028-supplement-4.pdf [file NIHMS539028-supplement-4.pdf]

**Supplementary Table 2. Complete list of differentially expressed genes between intramucosal carcinomas and adenomas.**

| <b>Overexpressed in Intramucosal Carcinoma Relative to Adenoma</b> |                                                                                        |                                                                                                                                                                                                                            |
|--------------------------------------------------------------------|----------------------------------------------------------------------------------------|----------------------------------------------------------------------------------------------------------------------------------------------------------------------------------------------------------------------------|
| <b>Gene Symbol</b>                                                 | <b>Gene Name</b>                                                                       | <b>Gene Function</b>                                                                                                                                                                                                       |
| <i>St8sia6</i>                                                     | ST8 alpha-N-acetyl-neuraminide alpha-2,8-sialyltransferase 6                           | Sialyltransferase activity                                                                                                                                                                                                 |
| <i>Tnfsf10</i>                                                     | tumor necrosis factor (ligand) superfamily, member 10                                  | Tumor necrosis factor receptor binding, cytokine activity, regulation of apoptotic processes                                                                                                                               |
| <i>BC037703</i>                                                    | cDNA sequence BC037703                                                                 | Unknown                                                                                                                                                                                                                    |
| <i>Pcdh19</i>                                                      | protocadherin 19                                                                       | Calcium ion binding, cell adhesion                                                                                                                                                                                         |
| <i>Slc19a3</i>                                                     | solute carrier family 19 (sodium/hydrogen exchanger), member 3                         | Folic acid binding, thiamine transmembrane transport                                                                                                                                                                       |
| <i>BC057170</i>                                                    | cDNA sequence BC057170                                                                 | Cellular response to interferon gamma, defense response to protozoa and Gram positive bacteria                                                                                                                             |
| <i>Syt11</i>                                                       | synaptotagmin XI                                                                       | Calcium-dependent phospholipid binding                                                                                                                                                                                     |
| <i>Pcdhb4</i>                                                      | protocadherin beta 4                                                                   | Cell adhesion                                                                                                                                                                                                              |
| <i>Ramp3</i>                                                       | receptor (calcitonin) activity modifying protein 3                                     | G-protein coupled receptor signaling pathway                                                                                                                                                                               |
| <i>Gzmb</i>                                                        | granzyme B                                                                             | T-cell mediated cytotoxicity, apoptosis, serine-type endopeptidase activity                                                                                                                                                |
| <i>Sema3e</i>                                                      | sema domain, immunoglobulin domain (Ig), short basic domain, secreted, (semaphorin) 3E | Angiogenesis and patterning of blood vessels, cell differentiation, nervous system development, synapse organization, negative regulation of cell matrix adhesion                                                          |
| <i>Gata5</i>                                                       | GATA binding protein 5                                                                 | RNA polymerase II distal enhancer sequence-specific DNA binding transcription factor activity, cellular response to BMP, intestinal epithelial differentiation                                                             |
| <i>Cxcl13</i>                                                      | chemokine (C-X-C motif) ligand 13                                                      | CXCR3, -5, and -10 chemokine receptor binding, B cell chemotaxis across high endothelial venule, activation of Rap GTPase activity, lymph node development, positive regulation of cell-cell adhesion mediated by integrin |
| <i>Dnase1l3</i>                                                    | deoxyribonuclease 1-like 3                                                             | Endonuclease activity, apoptotic DNA fragmentation                                                                                                                                                                         |
| <i>Plid5</i>                                                       | phospholipase D family, member 5                                                       | Catalytic activity                                                                                                                                                                                                         |
| <i>Lcn2</i>                                                        | lipocalin 2                                                                            | Iron ion binding, siderophore transport, innate                                                                                                                                                                            |

|                                                                    |                                                              |                                                                                                                                                                                                                                                                                                  |
|--------------------------------------------------------------------|--------------------------------------------------------------|--------------------------------------------------------------------------------------------------------------------------------------------------------------------------------------------------------------------------------------------------------------------------------------------------|
|                                                                    |                                                              | immune response, regulation of apoptotic processes                                                                                                                                                                                                                                               |
| <i>Tm7sf4</i>                                                      | transmembrane 7 superfamily member 4                         | Cell membrane fusion, myeloid dendritic cell differentiation, cellular response to tumor necrosis factor and macrophage colony-stimulating factor, osteoclast fusion, regulation of macrophage fusion, regulation of monocyte differentiation                                                    |
| <i>Rbm24</i>                                                       | RNA binding motif protein 24                                 | mRNA 3'-UTR binding, regulation of myotube differentiation, regulation of mRNA stability                                                                                                                                                                                                         |
| <i>5033414K04Rik</i>                                               | phosphotyrosine interaction domain containing 1              | Cellular response to interleukin-6, to fatty acid, to leptin stimulus, to tumor necrosis factor; negative regulation of glucose import; positive regulation of ATP biosynthetic process; regulation of mitochondrial membrane potential; regulation of reactive oxygen species metabolic process |
| <i>NA</i>                                                          | <i>NA</i>                                                    | Unknown                                                                                                                                                                                                                                                                                          |
| <i>Scara3</i>                                                      | scavenger receptor class A, member 3                         | Unknown                                                                                                                                                                                                                                                                                          |
| <i>Ift57</i>                                                       | intraflagellar transport 57 homolog (Chlamydomonas)          | Component of Golgi apparatus, cilium, dendrite terminus, microtubule basal body, and photoreceptor connecting cilium                                                                                                                                                                             |
| <i>Cdo1</i>                                                        | cysteine dioxygenase 1, cytosolic                            | Cystine dioxygenase activity, L-cysteine catabolism to taurine, oxidation-reduction process                                                                                                                                                                                                      |
| <i>Vtcn1</i>                                                       | V-set domain containing T cell activation inhibitor 1        | Interferon-gamma secretion, interleukin-4 secretion, negative T-cell activation regulation, response to protozoa                                                                                                                                                                                 |
| <i>Serpina1a</i>                                                   | serine (or cysteine) peptidase inhibitor, clade A, member 1A | Protein N-linked glycosylation, response to cytokine stimulus, response to peptide hormone stimulus                                                                                                                                                                                              |
| <i>Wdr49</i>                                                       | WD repeat domain 49                                          | Unknown                                                                                                                                                                                                                                                                                          |
| <i>Clip4</i>                                                       | CAP-GLY domain containing linker protein family, member 4    | Unknown                                                                                                                                                                                                                                                                                          |
| <b>Overexpressed in Adenoma Relative to Intramucosal Carcinoma</b> |                                                              |                                                                                                                                                                                                                                                                                                  |
| <i>Lrrc19</i>                                                      | leucine rich repeat containing 19                            | Unknown                                                                                                                                                                                                                                                                                          |
| <i>Akr1c14</i>                                                     | aldo-keto reductase family 1, member C14                     | Androsterone dehydrogenase activity, oxidation-reduction process                                                                                                                                                                                                                                 |
| <i>Retnlb</i>                                                      | resistin like beta                                           | Activity in gut parasite infection, goblet cell function, Th2 associated cytokine with inflammatory and                                                                                                                                                                                          |

|                      |                                                                                                               |                                                                                                                                                                                                                     |
|----------------------|---------------------------------------------------------------------------------------------------------------|---------------------------------------------------------------------------------------------------------------------------------------------------------------------------------------------------------------------|
|                      |                                                                                                               | remodeling activity                                                                                                                                                                                                 |
| <i>Nr0b1</i>         | nuclear receptor subfamily 0, group B, member 1                                                               | RNA binding, Leydig and Sertoli cell differentiation, negative regulation of transcription from RNA polymerase II promoter, response to stress, DNA-dependent negative regulation of transcription, spermatogenesis |
| <i>Mettl7b</i>       | methyltransferase like 7B                                                                                     | Unknown                                                                                                                                                                                                             |
| <i>Glod5</i>         | glyoxalase domain containing 5                                                                                | Unknown                                                                                                                                                                                                             |
| <i>9030619P08Rik</i> | RIKEN cDNA 9030619P08 gene                                                                                    | Unknown                                                                                                                                                                                                             |
| <i>Sprr1a</i>        | small proline-rich protein 1A                                                                                 | Component of cell periphery                                                                                                                                                                                         |
| <i>Olf165</i>        | olfactory receptor 165                                                                                        | G-protein coupled receptor activity, olfactory receptor activity                                                                                                                                                    |
| <i>C130090K23Rik</i> | Cwh43 cell wall biogenesis C-terminal homolog (S. cerevisiae)                                                 | Unknown                                                                                                                                                                                                             |
| <i>Gal3st2</i>       | galactose-3-O-sulfotransferase 2                                                                              | Galactose 3-O-sulfotransferase activity, glycoprotein biosynthetic process, sulfation, membrane component                                                                                                           |
| <i>Acsm3</i>         | acyl-CoA synthetase medium-chain family member 3                                                              | Fatty acid ligase activity, fatty acid biosynthetic process, component of mitochondrial matrix                                                                                                                      |
| <i>St6galnac6</i>    | ST6 (alpha-N-acetyl-neuraminy1-2,3-beta-galactosyl-1,3)-N-acetylgalactosaminide alpha-2,6-sialyltransferase 6 | Alpha-N-acetylgalactosaminide alpha-2, 6-sialyltransferase activity, ganglioside biosynthetic process, oligosaccharide biosynthetic process                                                                         |
| <i>Sval1</i>         | seminal vesicle antigen-like 1                                                                                | Unknown                                                                                                                                                                                                             |
| <i>Gcnt3</i>         | glucosaminy1 (N-acetyl) transferase 3, mucin type                                                             | Immunoglobulin production in mucosal tissue, intestinal absorption, metabolic process                                                                                                                               |
| <i>Slc17a9</i>       | solute carrier family 17, member 9                                                                            | Transporter activity                                                                                                                                                                                                |
| <i>Gal3st2</i>       | galactose-3-O-sulfotransferase 2                                                                              | Galactose 3-O-sulfotransferase activity, glycoprotein biosynthetic process, sulfation, membrane component                                                                                                           |
| <i>Rnf39</i>         | ring finger protein 39                                                                                        | Unknown                                                                                                                                                                                                             |
| <i>Ddah1</i>         | dimethylarginine dimethylaminohydrolase 1                                                                     | Dimethylargininase activity, positive regulation of nitric oxide biosynthetic process, regulation of systemic arterial blood pressure, component of mitochondrion                                                   |
| <i>Muc2</i>          | mucin 2                                                                                                       | Apoptotic process, negative regulation of cell migration and proliferation, component of inner and                                                                                                                  |

|                 |                                                                                                                  |                                                                                                                                                                                                                                                                                                                     |
|-----------------|------------------------------------------------------------------------------------------------------------------|---------------------------------------------------------------------------------------------------------------------------------------------------------------------------------------------------------------------------------------------------------------------------------------------------------------------|
|                 |                                                                                                                  | outer intestinal mucus layer and proteinaceous extracellular matrix                                                                                                                                                                                                                                                 |
| <i>Galnt12</i>  | UDP-N-acetyl-alpha-D-galactosamine:polypeptide N-acetylgalactosaminyltransferase 12                              | Polypeptide N-acetylgalactosaminyltransferase activity                                                                                                                                                                                                                                                              |
| <i>Tff3</i>     | trefoil factor 3, intestinal                                                                                     | Component of secretory granule (intestinal goblet cells)                                                                                                                                                                                                                                                            |
| <i>Best2</i>    | bestrophin 2                                                                                                     | Chloride channel activity, membrane depolarization, component of cilia                                                                                                                                                                                                                                              |
| <i>Tmem117</i>  | transmembrane protein 117                                                                                        | Unknown                                                                                                                                                                                                                                                                                                             |
| <i>Hepacam2</i> | HEPACAM family member 2                                                                                          | Possible role in cell division                                                                                                                                                                                                                                                                                      |
| <i>Chst4</i>    | carbohydrate (chondroitin 6/keratan) sulfotransferase 4                                                          | Leukocyte tethering or rolling, protein sulfation                                                                                                                                                                                                                                                                   |
| <i>Emp1</i>     | epithelial membrane protein 1                                                                                    | Unknown                                                                                                                                                                                                                                                                                                             |
| <i>Rep15</i>    | RAB15 effector protein                                                                                           | Unknown                                                                                                                                                                                                                                                                                                             |
| <i>Pmp22</i>    | peripheral myelin protein 22                                                                                     | Myelin assembly                                                                                                                                                                                                                                                                                                     |
| <i>Akr1c12</i>  | aldo-keto reductase family 1, member C12                                                                         | Unknown                                                                                                                                                                                                                                                                                                             |
| <i>Mfsd4</i>    | major facilitator superfamily domain containing 4                                                                | Unknown                                                                                                                                                                                                                                                                                                             |
| <i>Fabp7</i>    | fatty acid binding protein 7, brain                                                                              | Cell proliferation in forebrain, neurogenesis, prepulse inhibition, startle response, component of cell projections and neuronal cell body                                                                                                                                                                          |
| <i>Kcnk6</i>    | potassium inwardly-rectifying channel, subfamily K, member 6                                                     | Possible potassium ion transmembrane transport                                                                                                                                                                                                                                                                      |
| <i>Stc2</i>     | stanniocalcin 2                                                                                                  | Cellular calcium ion homeostasis, endoplasmic reticulum unfolded protein response, negative regulation of multicellular organism growth, regulation of store-operated calcium entry, response to endoplasmic reticulum stress, response to oxidative stress, component of Golgi apparatus and endoplasmic reticulum |
| <i>Cgref1</i>   | cell growth regulator with EF hand domain 1                                                                      | Possible cell adhesion and cell cycle arrest                                                                                                                                                                                                                                                                        |
| <i>Hpgd</i>     | hydroxyprostaglandin dehydrogenase 15 (NAD)                                                                      | 15-hydroxyprostaglandin dehydrogenase (NAD+) activity, ductus arteriosus closure, oxidation-reduction process                                                                                                                                                                                                       |
| <i>Sema4g</i>   | sema domain, immunoglobulin domain (Ig), transmembrane domain (TM) and short cytoplasmic domain, (semaphorin) 4G | Possible cell differentiation                                                                                                                                                                                                                                                                                       |
| <i>Cox7a1</i>   | cytochrome c oxidase, subunit VIIa 1                                                                             | Component of mitochondria                                                                                                                                                                                                                                                                                           |

|                |                                                                  |                                                                                                                               |
|----------------|------------------------------------------------------------------|-------------------------------------------------------------------------------------------------------------------------------|
| <i>Gm459</i>   | Igkv4-86 immunoglobulin kappa variable 4-86                      | Unknown                                                                                                                       |
| <i>Lgals3</i>  | lectin, galactose binding, soluble 3                             | Extracellular matrix organization, skeletal system development, component of cytoplasm and proteinaceous extracellular matrix |
| <i>B4galt4</i> | UDP-Gal:betaGlcNAc beta 1,4-galactosyltransferase, polypeptide 4 | Possible N-acetyllactosamine synthase activity, possible metal ion binding                                                    |
